# Supplementary material for: Photonic paper: Multiscale assembly of reflective cellulose sheets in Lunaria annua
Source: PubMed Central journal article supplement — Sci Adv. 2020 Jul 1;6(27):eaba8966. doi: 10.1126/sciadv.aba8966 (PMC7458438; doi:10.1126/sciadv.aba8966), 2020-07-01
Supplement: aba8966_SM.pdf [file aba8966_SM.pdf]

## Supplementary Materials for

### **Photonic paper: Multiscale assembly of reflective cellulose sheets in *Lunaria annua***

G. Guidetti, H. Sun, B. Marelli, F. G. Omenetto\*

\*Corresponding author. Email: [fiorenzo.omenetto@tufts.edu](mailto:fiorenzo.omenetto@tufts.edu)

Published 1 July 2020, *Sci. Adv.* **6**, eaba8966 (2020)

DOI: [10.1126/sciadv.aba8966](https://doi.org/10.1126/sciadv.aba8966)

#### **This PDF file includes:**

Figs. S1 to S7

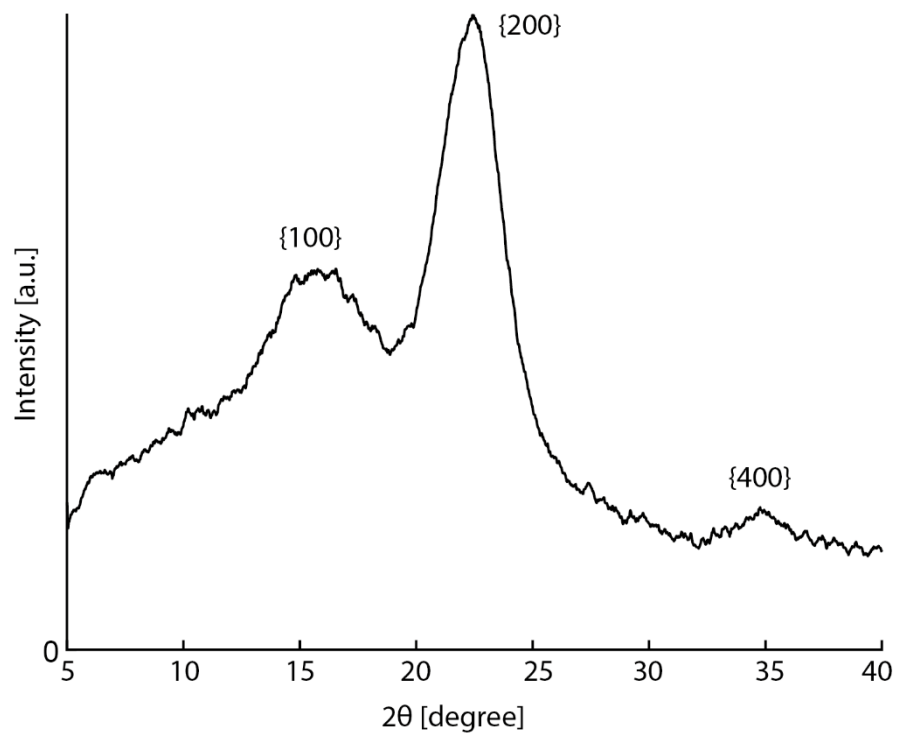

**Fig. S1. X-ray diffraction plot of a *Lunaria annua* septum.** The crystalline structure of the cellulose in the septum is cellulose I. This is confirmed by the peak positions of the crystalline family planes {100}, {200}, and {400} which are, respectively, at  $2\theta \sim 14-17^\circ$ ,  $\sim 22^\circ$ , and  $34^\circ$ .

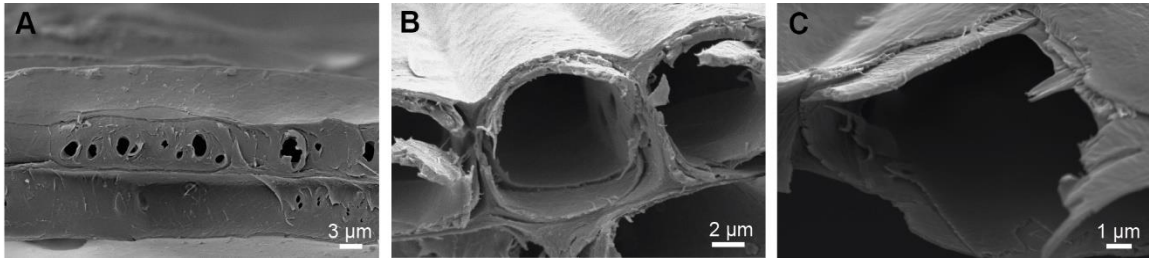

**Fig. S2. Thin-film assembly in the *Lunaria* septum cells.** The cellulose thin-film assembly in the cell wall can be seen in the delaminating bilayer construct (A) and in the cross-section of the cells (B) and (C). The cell wall pores can also be seen along the length of the cell in (A).

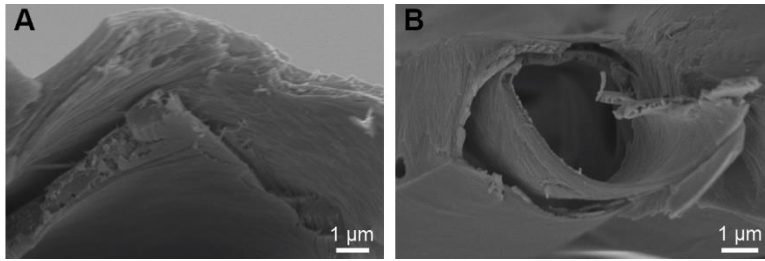

**Fig. S3. Orientation of the cellulose fibers in the *Lunaria* cells' cladding.** The cellulose fibers are seen aligning along the circumference of the thin film cladding constituting the cell wall.

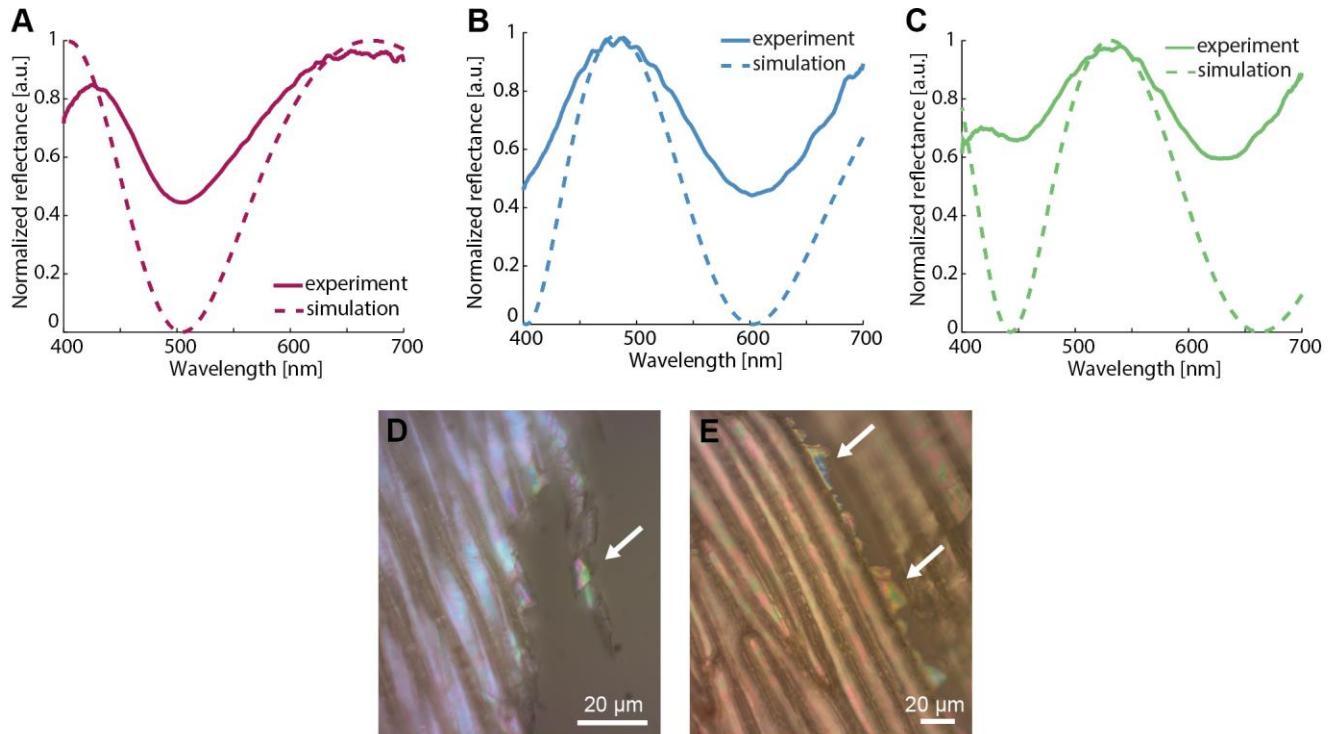

**Fig. S4 Thin-film interference coloration in *Lunaria annua* septa.** At the microscopic level the reflectance from individually colored regions consists in fringes caused by thin-film interference (solid lines). This behavior is confirmed by the reflectance spectrum (dashed lines) originated by simulating a 1D-thin film of cellulose surrounded by air which corresponds to the upper cladding of a single cell in the *Lunaria* septum. The experimental spectra reported in (A), (B) and (C) correspond, respectively, to the magenta, blue and green single-colored regions of Figure 2B. The simulated spectra reported in (A), (B) and (C) have been calculated using a cellulose thickness of, respectively, 318 nm, 380 nm, and 418 nm. (D) and (E) show macroscopic brightfield reflectance images of *Lunaria annua* septa where thin-film interference colors can be observed in delaminating regions of the cells (D, white arrow) and in broken parts of the cladding (E, white arrows).

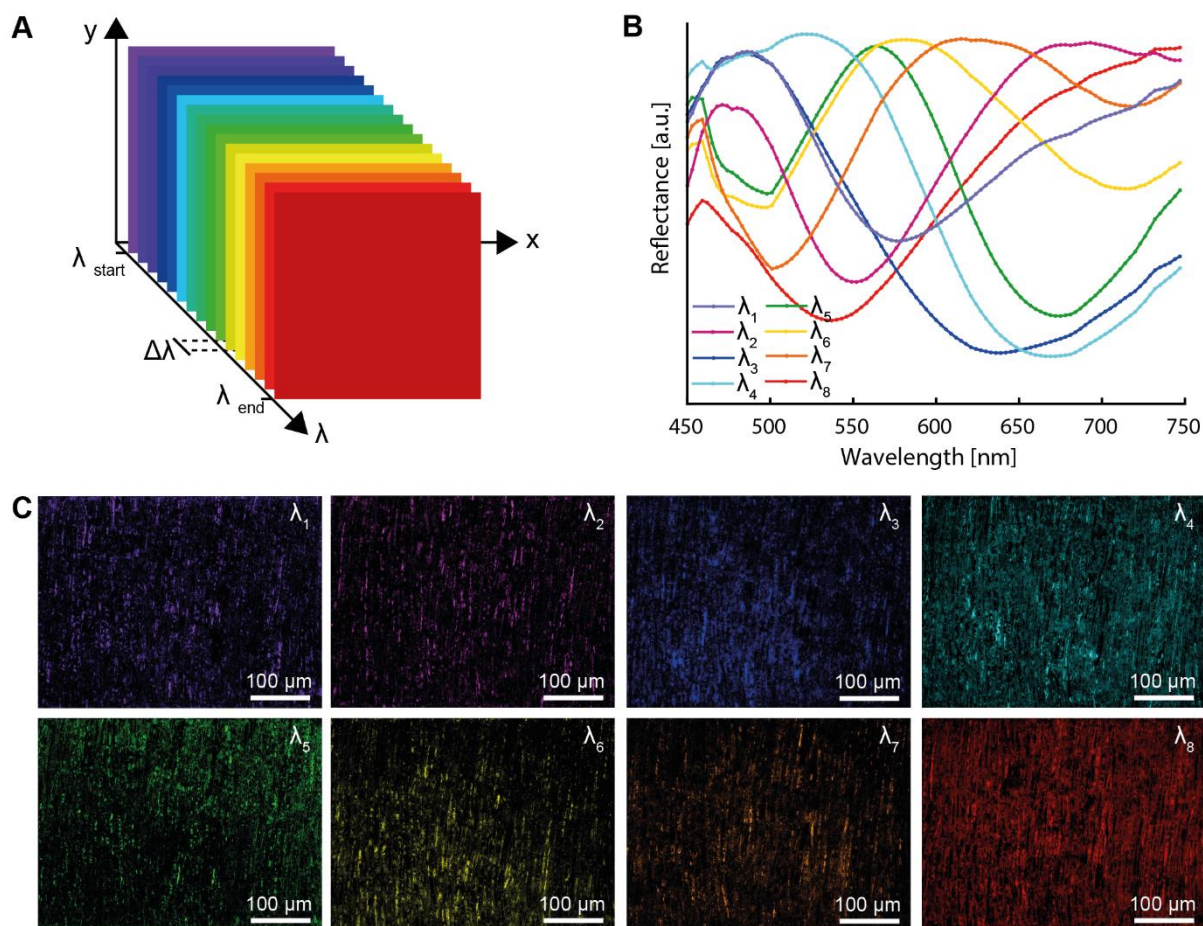

**Fig. S5 Multispectral mapping of *Lunaria annua* septum.** (A) Schematic representing the three-dimensional maps that can be obtained with a multispectral camera. The spectroscopic information of the sample, defined by the spatial coordinates  $x$  and  $y$ , is collected for each pixel at every wavelength defined by the range  $\lambda_{\text{start}}-\lambda_{\text{end}}$  and by the step size  $\Delta\lambda$ . The stack of these images creates the three-dimensional map. (B) Reflectance spectra for 8 selected spectral bands corresponding to the main reflected colors from the *Lunaria* septum acquired in the spectral range 450-750 nm with a step size  $\Delta\lambda = 3$  nm. (C) Corresponding false-color optical micrographs for each of the 8 selected spectral regions, showing the spatial localization of each reflected color.

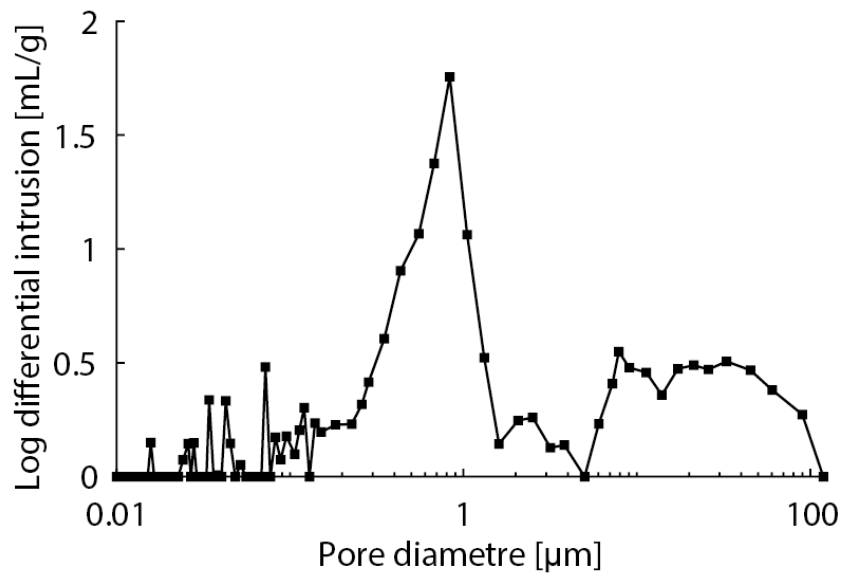

**Fig. S6.** Size distribution of the pores size in *Lunaria annua septa*. Pores diameter as determined using the Washburn equation corresponding to the cumulative intrusion data of Figure 3G.

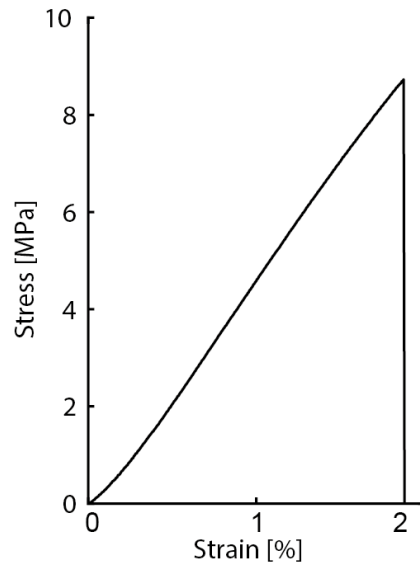

**Fig. S7. Mechanical behavior of a representative *Lunaria* septum.** The stress-strain curve of a representative *Lunaria* septum is indicative of a strong material with elastic behavior.
